# Supplementary material for: Computational Account of Spontaneous Activity as a Signature of Predictive Coding
Source: PLOS journal article supplement (doi:10.1371/journal.pcbi.1005355), 2017-01-23
Supplement: S1 (10.1371/journal.pcbi.1005355.s001) [file journal.pcbi.1005355.s001]

## Supplementary information

Table 1 lists all variables that are part of the framework. Tables 2 and 3 list parameters that were used for simulations of the model with all-to-all connectivity and of the model with local connectivity, respectively. Parameters used for generating figure 1 are listed in the figure caption. Unless otherwise reported in the figure caption, we used fixed set of parameters, according to tables 2 and 3.

**Table 1: List of variables**

| variable                                                                   | description                             |
|----------------------------------------------------------------------------|-----------------------------------------|
| $s_j(t)$                                                                   | j-th input                              |
| $\bar{s}_j(t)$                                                             | j-th dimension of the signal            |
| $\hat{s}_j(t)$                                                             | j-th dimension of the estimate          |
| $V_i(t)$                                                                   | membrane potential of neuron $i$        |
| $r_i(t)$                                                                   | instantaneous firing rate of neuron $i$ |
| $o_i(t)$                                                                   | spike train of neuron $i$               |
| $\text{Thres}_i$                                                           | firing threshold of neuron $i$          |
| $MUA(t)$                                                                   | multi-unit activity                     |
| $E(t)$                                                                     | objective function                      |
| $\langle error \rangle$                                                    | mean error                              |
| $\langle cost \rangle$                                                     | mean cost                               |
| $Total\ error = \alpha \langle error \rangle + \beta \langle cost \rangle$ | inverse efficiency                      |

**Table 2: Parameters of all-to-all connected network with random weights**

| parameter         | description                                               | value                                 |
|-------------------|-----------------------------------------------------------|---------------------------------------|
| $J$               | number of inputs                                          | 3                                     |
| $N$               | number of neurons                                         | 400                                   |
| $\lambda$         | membrane time constant                                    | 4 Hz                                  |
| $w_{ij}$          | neural weights                                            | $\mathcal{N}(0, 1)$                   |
| $\lambda_{input}$ | time constant of the input current                        | 20 Hz                                 |
| $\nu$             | linear cost constant                                      | 5                                     |
| $\mu$             | quadratic cost constant                                   | 5                                     |
| $\sigma$          | standard deviation of the noise in the membrane potential | $0.25 \text{ ms}^{-1}$                |
| $p_{spike}$       | probability of spiking when the threshold is reached      | 1                                     |
| $\lambda_D$       | time constant of the multi-unit activity                  | 50 Hz                                 |
| u.c.              | Up state criterion                                        | 20 % of neurons simultaneously active |
| $\Delta$          | transmission delay                                        | 1 ms                                  |

**Table 3: Parameters of spatially organized network with local connectivity**

| parameter         | description                                               | value                                 |
|-------------------|-----------------------------------------------------------|---------------------------------------|
| $J$               | number of inputs                                          | 60                                    |
| $N$               | number of neurons                                         | 400                                   |
| $\lambda$         | membrane time constant                                    | 4 Hz                                  |
| $A$               | controls the strength of the input                        | 0.3                                   |
| $B$               | controls the spread of the input                          | 1                                     |
| $C$               | peak amplitude of the tuning curve                        | 1                                     |
| $D$               | controls the width of the tuning curve                    | 50                                    |
| $\lambda_{input}$ | time constant of the input current                        | 2 Hz                                  |
| $\nu$             | linear cost constant                                      | 19                                    |
| $\mu$             | quadratic cost constant                                   | 19                                    |
| $\sigma$          | standard deviation of the noise in the membrane potential | $0.1 \text{ ms}^{-1}$                 |
| $p_{spike}$       | probability of spiking when the threshold is reached      | 1                                     |
| $\lambda_D$       | time constant of the multi-unit activity                  | 50 Hz                                 |
| u.c.              | Up state criterion                                        | 20 % of neurons simultaneously active |
| $\Delta$          | transmission delay                                        | 2 ms                                  |
